# Supplementary material
Source: PubMed Central journal article supplement (PMC3416632)
Supplement: AEM.01503-12_zam999103586so1.pdf [file AEM.01503-12_zam999103586so1.pdf]

**Characterization of the two *Neurospora crassa* cellobiose dehydrogenases  
and their connection to oxidative cellulose degradation**

**Supplementary Material**

Christoph Sygmund,<sup>†</sup> Daniel Kracher,<sup>†</sup> Stefan Scheiblbrandner, Kawah Zahma,  
Alfons K. G. Felice, Wolfgang Harreither, Roman Kittl  
and Roland Ludwig<sup>\*</sup>

*Food Biotechnology Laboratory, Department of Food Sciences and –Technology, BOKU –  
University of Natural Resources and Life Sciences, Muthgasse 18, A-1090 Vienna, Austria*

<sup>†</sup>C.S and D.K. contributed equally

<sup>\*</sup>Corresponding author. Mailing address: Department für Lebensmittelwissenschaften und -  
technologie, Universität für Bodenkultur, Muthgasse 18/2, A-1190 Wien, Austria. Phone:  
+431 47654 6149. Fax: +431 47654 6199 E-mail: roland.ludwig@boku.ac.at

**Table S1.** Purification of recombinant CDH IIA and CDH IIB produced by *P. pastoris*.

|                | Purification step | Total activity                | Spec. Act. [U mg <sup>-1</sup> ] |                   | Ratio<br>cyt <i>c</i> /DCIP | Purification <sup>c</sup><br>[fold] | Yield<br>[%] |
|----------------|-------------------|-------------------------------|----------------------------------|-------------------|-----------------------------|-------------------------------------|--------------|
|                |                   | Cyt <i>c</i> <sup>a</sup> [U] | Cyt <i>c</i> <sup>a</sup>        | DCIP <sup>b</sup> |                             |                                     |              |
| <b>CDH IIA</b> | Crude extract     | 1700                          | 1.3                              | 6.1               | 0.21                        | 1                                   | 100          |
|                | Phenyl-Sepharose  | 1410                          | 7.8                              | 20                | 0.39                        | 6.0                                 | 83           |
|                | DEAE-Sepharose    | 1250                          | 8.3                              | 21.2              | 0.39                        | 6.4                                 | 73           |
| <b>CDH IIB</b> | Crude extract     | 590                           | 0.20                             | 0.63              | 0.32                        | 1                                   | 100          |
|                | Phenyl-Sepharose  | 255                           | 0.41                             | 0.79              | 0.52                        | 2.1                                 | 43           |
|                | Q Source          | 140                           | 1.1                              | 2.1               | 0.52                        | 5.5                                 | 24           |
|                | Gel filtration    | 65                            | 3.0                              | 5.1               | 0.59                        | 15                                  | 11           |

<sup>a</sup> Enzymatic activity was measured at pH 6.0

<sup>b</sup> Enzymatic activity was measured at pH 5.0

<sup>c</sup> The purification factor is calculated from the specific activity obtained with the cyt *c* assay, which is specific for CDH.

**TABLE S2.** Substrate specificities of CDH IIA and CDH IIB for various carbohydrates (final concentration 100 mM) measured with the indicated electron acceptors at pH 5.0 (DCIP) or pH 6.0 (cyt *c*, 1,4-benzoquinone. Relative activities (%) are compared to the activity obtained with cellobiose.

| Substrate   | CDH IIA |              |                   | CDH IIB |              |                   |
|-------------|---------|--------------|-------------------|---------|--------------|-------------------|
|             | DCIP    | Cyt <i>c</i> | 1,4-Benzo-quinone | DCIP    | Cyt <i>c</i> | 1,4-Benzo-quinone |
| Cellobiose  | 100     | 100          | 100               | 100     | 100          | 100               |
| Lactose     | 121     | 91           | 94                | 79      | 122          | 108               |
| Maltotriose | 13.3    | 28.4         | 6.6               | 23.1    | 27.3         | 8.8               |
| Maltose     | 2       | 4.5          | 2.1               | 12.8    | 19.2         | 7.0               |
| Glucose     | 6       | 12.6         | 3.8               | 42.7    | 52.5         | 25.6              |
| Galactose   | 3       | 7            | 1.6               | 5.5     | 11.8         | 3.4               |
| Xylose      | 1       | 1.3          | 1.3               | 2.5     | 5.7          | 2.1               |
| Mannose     | 1.3     | 1.5          | 1.1               | 6.8     | 10           | 3.7               |

**TABLE S3.** Substrate inhibition values of *N. crassa* CDH IIA and CDH IIB for cellobiose and lactose in the presence of 300  $\mu$ M DCIP as electron acceptor for pH values between 4.0 – 7.0.

| pH  | Carbohydrate | CDH IIA       | CDH IIB       |
|-----|--------------|---------------|---------------|
|     |              | $K_i$<br>[mM] | $K_i$<br>[mM] |
| 4.0 | Cellobiose   | 340 $\pm$ 27  | 150 $\pm$ 12  |
|     | Lactose      | 900 $\pm$ 65  | 210 $\pm$ 13  |
| 5.0 | Cellobiose   | 250 $\pm$ 16  | 240 $\pm$ 17  |
|     | Lactose      | 600 $\pm$ 38  | 420 $\pm$ 24  |
| 6.0 | Cellobiose   | 320 $\pm$ 19  | 150 $\pm$ 11  |
|     | Lactose      | 850 $\pm$ 44  | 210 $\pm$ 12  |
| 7.0 | Cellobiose   | 700 $\pm$ 26  | 120 $\pm$ 10  |
|     | Lactose      | 580 $\pm$ 21  | 150 $\pm$ 9   |

|      |                                                             |      |
|------|-------------------------------------------------------------|------|
| 1    | ATG AAG ACT GGT TCC ATC TTG GCT GCT TTG GTT GCT TCT GCT TCC | 45   |
| 1    | Met Lys Thr Gly Ser Ile Leu Ala Ala Leu Val Ala Ser Ala Ser | 15   |
| 46   | GCT CAC ACT ATC TTC CAA AAG GTT TCT GTT AAC GGT GCT GAC CAG | 90   |
| 16   | Ala His Thr Ile Phe Gln Lys Val Ser Val Asn Gly Ala Asp Gln | 30   |
| 91   | GGT CAG TTG AAG GGT ATT AGG GCT CCA GCT AAC AAC AAC CCA GTT | 135  |
| 31   | Gly Gln Leu Lys Gly Ile Arg Ala Pro Ala Asn Asn Asn Pro Val | 45   |
| 136  | ACT GAC GTT ATG TCC TCC GAC ATC ATC TGT AAC GCT GTT ACT ATG | 180  |
| 46   | Thr Asp Val Met Ser Ser Asp Ile Ile Cys Asn Ala Val Thr Met | 60   |
| 181  | AAG GAC TCC AAC GTT TTG ACT GTT CCA GCT GGT GCT AAG GTT GGT | 225  |
| 61   | Lys Asp Ser Asn Val Leu Thr Val Pro Ala Gly Ala Lys Val Gly | 75   |
| 226  | CAT TTT TGG GGT CAC GAA ATT GGT GGT GCT GCT GGT CCA AAC GAT | 270  |
| 76   | His Phe Trp Gly His Glu Ile Gly Gly Ala Ala Gly Pro Asn Asp | 90   |
| 271  | GCT GAT AAT CCA ATT GCT GCT TCC CAC AAG GGT CCA ATC ATG GTT | 315  |
| 91   | Ala Asp Asn Pro Ile Ala Ala Ser His Lys Gly Pro Ile Met Val | 105  |
| 316  | TAC TTG GCT AAA GTT GAC AAC GCT GCT ACT ACT GGT ACT TCC GGT | 360  |
| 106  | Tyr Leu Ala Lys Val Asp Asn Ala Ala Thr Thr Gly Thr Ser Gly | 120  |
| 361  | TTG AAG TGG TTC AAG GTT GCT GAA GCT GGT TTG TCC AAC GGA AAG | 405  |
| 121  | Leu Lys Trp Phe Lys Val Ala Glu Ala Gly Leu Ser Asn Gly Lys | 135  |
| 406  | TGG GCT GTT GAT GAC TTG ATC GCT AAC AAC GGT TGG TCC TAC TTC | 450  |
| 136  | Trp Ala Val Asp Asp Leu Ile Ala Asn Asn Gly Trp Ser Tyr Phe | 150  |
| 451  | GAC ATG CCA ACT TGT ATT GCT CCA GGT CAG TAC TTG ATG AGA GCT | 495  |
| 151  | Asp Met Pro Thr Cys Ile Ala Pro Gly Gln Tyr Leu Met Arg Ala | 165  |
| 496  | GAG TTG ATC GCT TTG CAC AAC GCT GGT TCT CAG GCT GGT GCT CAA | 540  |
| 166  | Glu Leu Ile Ala Leu His Asn Ala Gly Ser Gln Ala Gly Ala Gln | 180  |
| 541  | TTC TAC ATT GGT TGT GCT CAG ATC AAC GTT ACT GGT GGT GGT TCT | 585  |
| 181  | Phe Tyr Ile Gly Cys Ala Gln Ile Asn Val Thr Gly Gly Gly Ser | 195  |
| 586  | GCT TCT CCA TCC AAC ACT GTT TCT TTC CCT GGT GCT TAC TCT GCT | 630  |
| 196  | Ala Ser Pro Ser Asn Thr Val Ser Phe Pro Gly Ala Tyr Ser Ala | 210  |
| 631  | TCT GAC CCA GGT ATC TTG ATC AAC ATC TAC GGT GGT TCC GGT AAG | 675  |
| 211  | Ser Asp Pro Gly Ile Leu Ile Asn Ile Tyr Gly Gly Ser Gly Lys | 225  |
| 676  | ACT GAC AAC GGT GGT AAG CCA TAC CAA ATT CCA GGT CCA GCT TTG | 720  |
| 226  | Thr Asp Asn Gly Gly Lys Pro Tyr Gln Ile Pro Gly Pro Ala Leu | 240  |
| 721  | TTC ACT TGT CCT GCT GGT GGT TCA GGT GGA TCT TCT CCA GCT CCT | 765  |
| 241  | Phe Thr Cys Pro Ala Gly Gly Ser Gly Gly Ser Ser Pro Ala Pro | 255  |
| 766  | GCT ACA ACT GCT TCT ACT CCA AAG CCA ACT TCC GCT TCT GCT CCT | 810  |
| 256  | Ala Thr Thr Ala Ser Thr Pro Lys Pro Thr Ser Ala Ser Ala Pro | 270  |
| 811  | AAG CCT GTT TCT ACT ACT GCT TCC ACA CCT AAG CCT ACA AAC GGT | 855  |
| 271  | Lys Pro Val Ser Thr Thr Ala Ser Thr Pro Lys Pro Thr Asn Gly | 285  |
| 856  | TCT GGT TCT GGT ACA GGT GCT GCT CAC TCT ACT AAG TGT GGT GGA | 900  |
| 286  | Ser Gly Ser Gly Thr Gly Ala Ala His Ser Thr Lys Cys Gly Gly | 300  |
| 901  | TCT AAG CCA GCT GCT ACA ACA AAG GCT TCT AAC CCA CAG CCT ACT | 945  |
| 301  | Ser Lys Pro Ala Ala Thr Thr Lys Ala Ser Asn Pro Gln Pro Thr | 315  |
| 946  | AAT GGT GGT AAC TCC GCT GTT AGA GCT GCT GCT TTG TAC GGT CAA | 990  |
| 316  | Asn Gly Gly Asn Ser Ala Val Arg Ala Ala Ala Leu Tyr Gly Gln | 330  |
| 991  | TGT GGT GGT AAA GGT TGG ACT GGT CCA ACT TCT TGT GCT TCC GGT | 1035 |
| 331  | Cys Gly Gly Lys Gly Trp Thr Gly Pro Thr Ser Cys Ala Ser Gly | 345  |
| 1036 | ACT TGT AAG TTC TCC AAC GAC TGG TAC TCC CAG TGT TTG CCA TAA | 1080 |
| 346  | Thr Cys Lys Phe Ser Asn Asp Trp Tyr Ser Gln Cys Leu Pro End |      |

**FIG. S1.** Codon optimized nucleotide sequence and translated polypeptide of *N. crassa* GH61-3 NCU02916 for heterologous expression in *P. pastoris*.

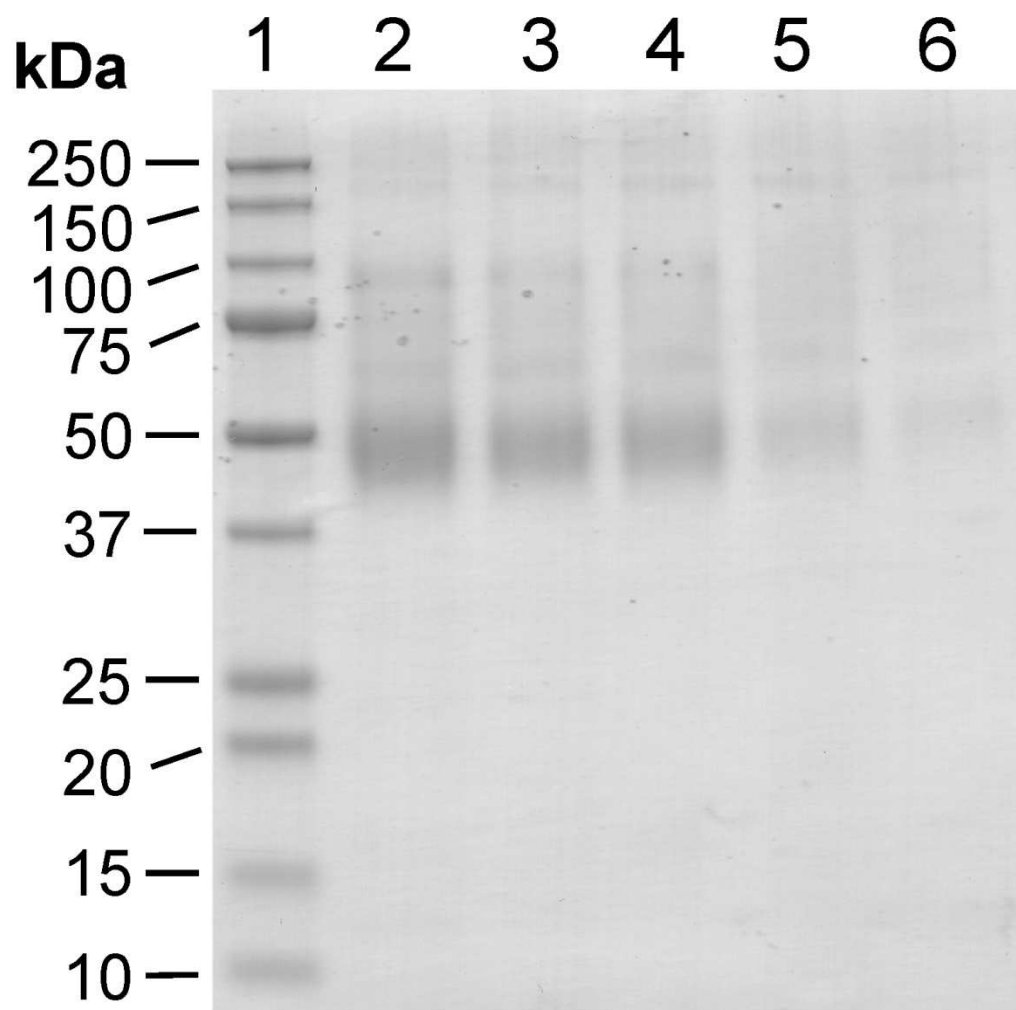

**FIG. S2.** Supernatant of fermentation samples of *N. crassa* GH61-3 NCU02916 applied on an SDS-PAGE and developed with Coomassie blue (Precision Plus protein standard, lane 1). Samples were taken 24 h (lane 6), 30 h (lane 5), 48 h (lane 4), 55 h (lane 3) and 73 h (lane 2) after induction with methanol. The production of GH61-3 NCU02916 is shown by the formation of a strong band at approx. 50 kDa.

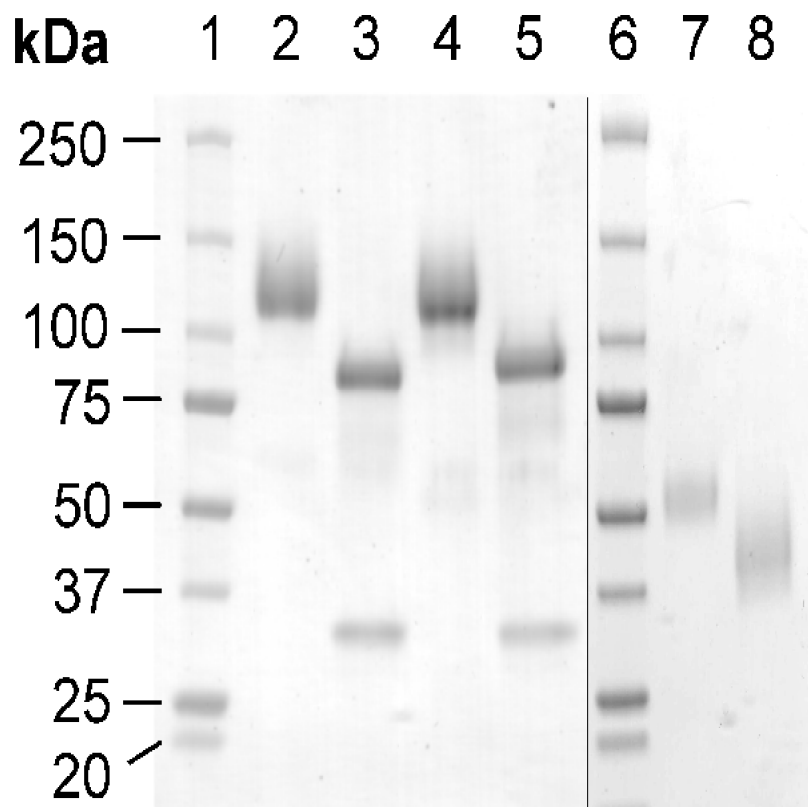

**FIG. S3.** SDS-PAGE: lane 1, molecular mass marker (Precision Plus Protein, Biorad); lane 2, purified CDH IIA; lane 3, deglycosylated CDH IIA; lane 4, CDH IIB; lane 5, deglycosylated CDH IIB; lane 6, molecular mass marker; lane 7, purified GH61-3; lane 8, partially deglycosylated GH61-3.

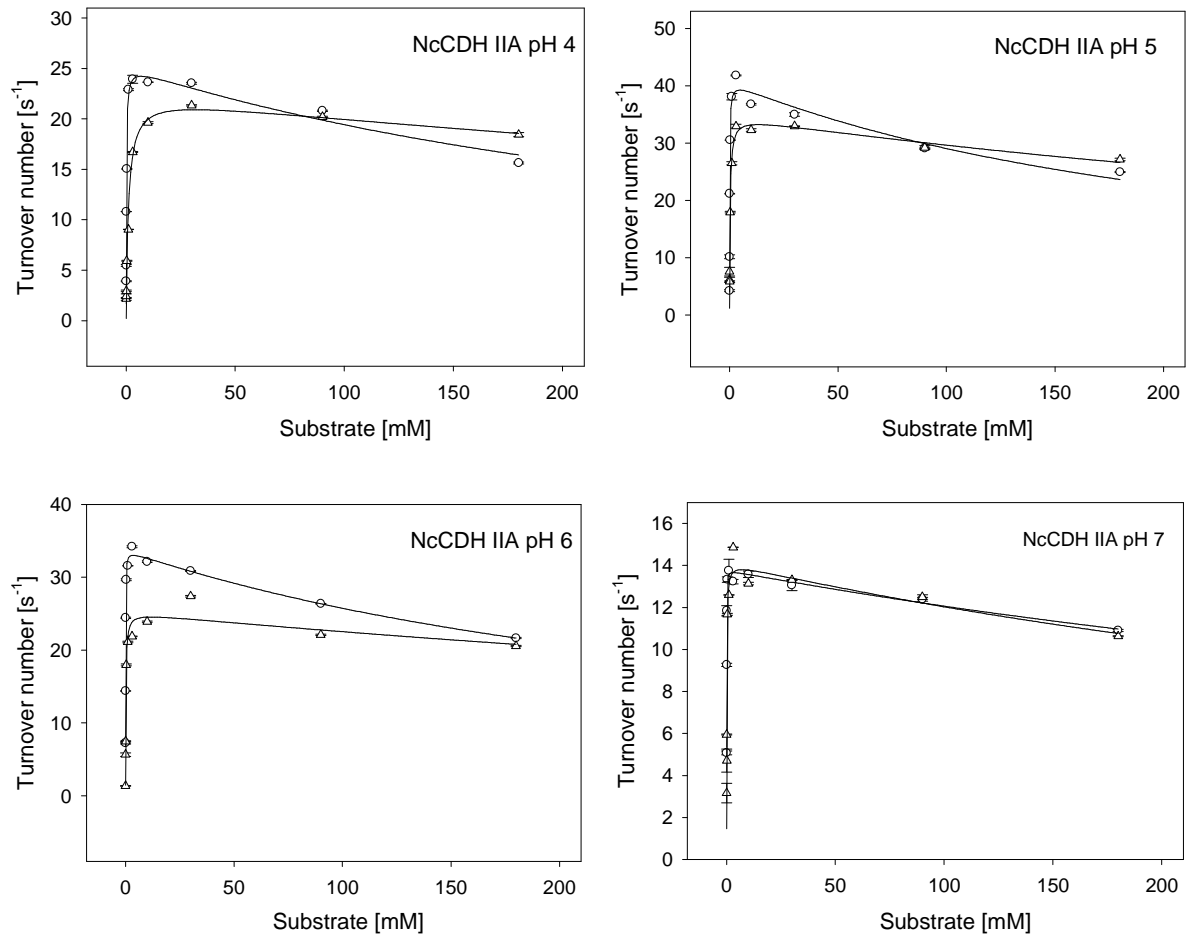

**FIG. S4.** Inhibition of *N. crassa* CDH IIA by cellobiose (triangles) and lactose (circles) in the presence of DCIP as electron acceptor at pH values between 4.0 – 7.0.



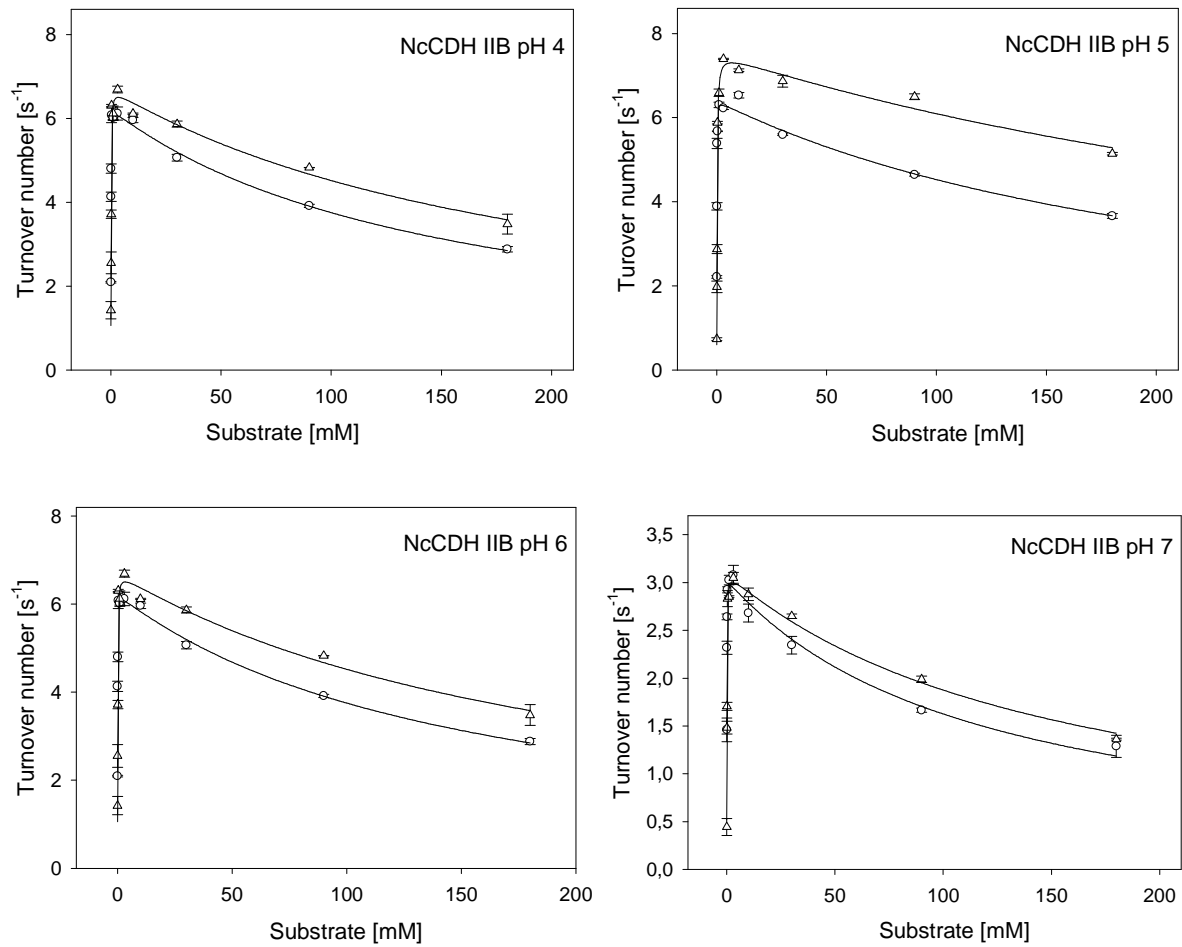

**FIG. S5.** Inhibition of *N. crassa* CDH IIB by cellobiose (triangles) and lactose (circles) in the presence of DCIP as electron acceptor at pH values between 4.0 – 7.0.

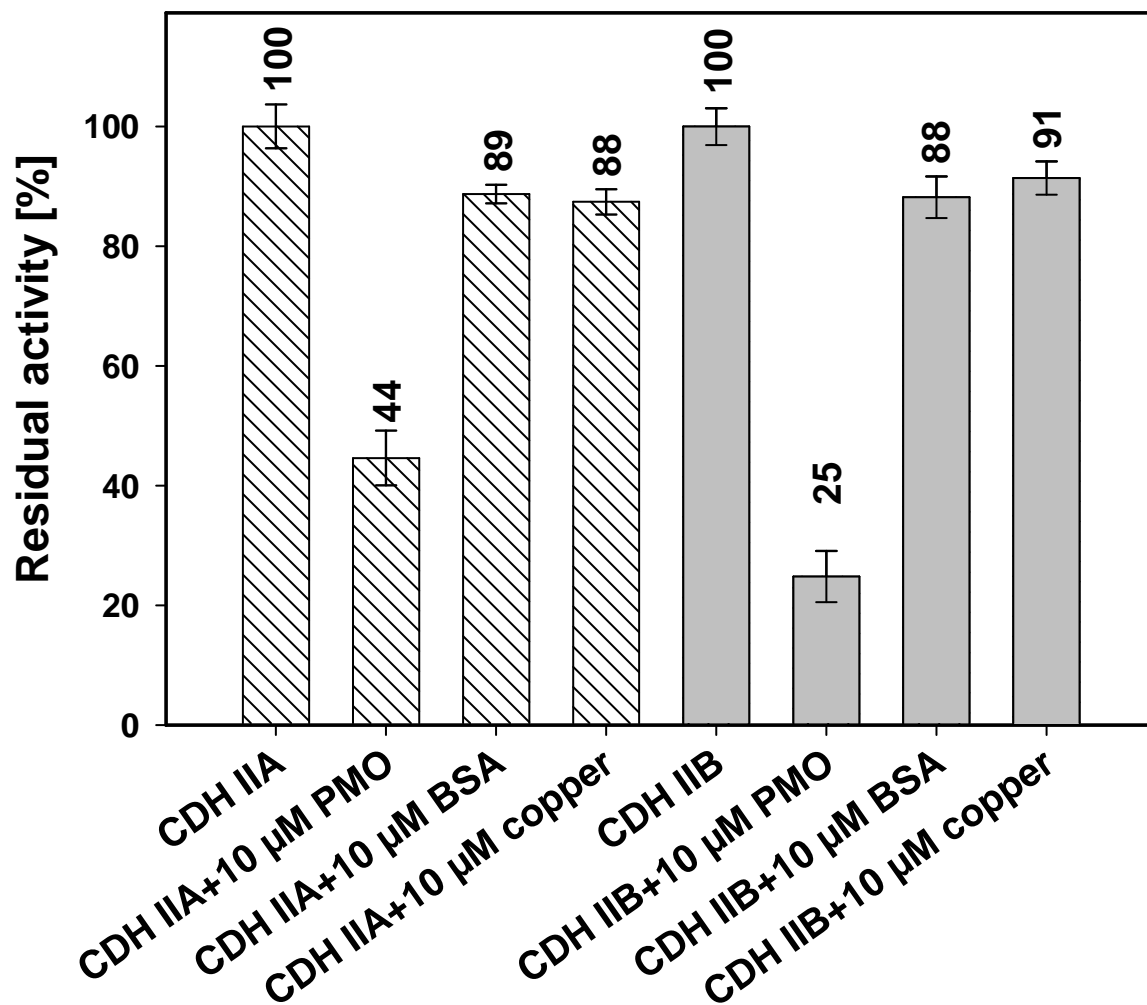

**FIG. S6.** Inhibition of the cyt *c* reducing activity of CDH IIA and CDH IIB at pH 6.0 by 10  $\mu$ M GH61-3, 10  $\mu$ M BSA and 10  $\mu$ M copper sulfate. The mean value of three measurements is given.
